# Supplementary material for: Perfluoroalkylated alternating copolymer possessing solubility in fluorous liquids and imaging capabilities under high energy radiation
Source: Royal Society of Chemistry journal article supplement (doi:10.1039/d0ra08539a), 2021-01-01
Supplement: d0ra08539a1.pdf [file d0ra08539a1.pdf]

## ***Supporting Information for***

# **Perfluoroalkylated alternating copolymer possessing solubility in fluoruous liquids and imaging capabilities under high energy radiation**

Hyun-Taek Oh,<sup>a</sup> Seok-Heon Jung,<sup>a</sup> Kang-Hyun Kim,<sup>b</sup> Yina Moon,<sup>†c</sup> Do Hyeon Jeong,<sup>c</sup> Yejin Ku,<sup>a</sup>  
Sangsul Lee,<sup>d</sup> Byeong-Gyu Park,<sup>d</sup> Jiyoul Lee,<sup>c</sup> Chawon Koh,<sup>e</sup> Nishi Tsunehiro,<sup>e</sup>  
Hyun-Woo Kim,<sup>e</sup> Jin-Kyun Lee\*<sup>a</sup>

<sup>a</sup> Department of Polymer Science and Engineering, Inha University, Incheon 22212, Republic of Korea.

<sup>b</sup> Department of Mechanical Engineering, POSTECH, Pohang 37673, Republic of Korea

<sup>c</sup> Pohang Accelerator Laboratory, POSTECH, Pohang 37673, Republic of Korea

<sup>d</sup> Department of Graphic Arts Information Engineering, Pukyong National University, Busan 48513, Republic of Korea.

<sup>e</sup> SAMSUNG Electronics Co. Ltd, Semiconductor R&D Center, Gyeonggi-do 18448, Republic of Korea

Correspondence to: Jin-Kyun Lee (jkl36@inha.ac.kr)

## **EXPERIMENTAL**

### **Materials**

Toluene, maleic anhydride and anhydrous THF were purchased from Sigma-Aldrich and used as received. 1,1,1,2,3,3-Hexafluoro-4-(1,1,2,3,3,3-hexafluoropropoxy)pentane (PF-7600) was bought from 3M Korea and used without further purification.

## Equipment

$^1\text{H}$  NMR spectra were recorded on a Avance III400 (400 MHz) spectrometer at ambient temperature using the chemical shift of a residual protic solvent ( $\text{CHCl}_3$  at  $\delta$  7.24 ppm) as a reference. All chemical shifts were quoted in parts per million (ppm) relative to the internal reference, and the coupling constants,  $J$ , were reported in Hz. Signal multiplicity was indicated as follows: s (singlet), d (doublet) and t (triplet). Attenuated total reflectance (ATR) FT-IR spectra were recorded on a Bruker VERTEX 80V. Size exclusion chromatography (SEC) was carried out on a Younglin GPC system (YL9100) equipped with a refractive index detector and a series of two columns (PL gel Mixed-C 5  $\mu\text{m}$  and PL gel Mixed-D 5  $\mu\text{m}$ ) by eluting 1,3-dichloro-1,1,2,2,3-pentafluoropropane (Asahiklin™ AK-225G) at 35 °C. Monodisperse PMMA (molecular weight from 860 to 2,200,000  $\text{g mol}^{-1}$ , Shodex™, Showa-Denko) was used as a reference standard for the SEC experiments. Electron beam (e-beam) lithography was carried out on a NANOBEAM NB3 exposure tool operating at an acceleration voltage of 80 kV with a probe current of 1.0 nA. Developed patterns of the polymer films were observed by scanning electron microscopy (SEM, Nanobeam NB3, 80 KeV) after sputter-coating of Pt. The nanoindentation tests were performed by a nano-indenter (Nanomechanics, USA) with a continuous stiffness measurement (CSM) technique. A Berkovich diamond tip was used in all the experiments.

## Synthesis

**1-(5,5,6,6,7,7,8,8,9,9,10,10,11,11,12,12,12-Heptadecafluorododecyl)-1H-pyrrole-2,5-dione ( $R_F\text{Mi}$ , **3**) by using maleic anhydride**

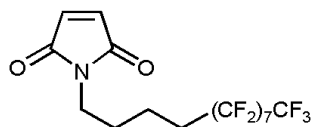

**$R_F\text{Mi}$  (**3**)**

To a magnetically stirred solution of 5,5,6,6,7,7,8,8,9,9,10,10,11,11,12,12,12-heptadecafluorododecan-1-amine (8.20 g, 16.7 mmol) in a mixture of  $\text{CH}_2\text{Cl}_2$  (50  $\text{cm}^3$ ) and acetone (5  $\text{cm}^3$ ) was added maleic anhydride (1.63 g, 16.7 mmol) at ambient temperature. The solution was stirred for 2 h. The solvent was then distilled off under reduced pressure, and NaOAc (2.27 g, 16.7 mmol) and  $\text{Ac}_2\text{O}$  (40  $\text{cm}^3$ ) were added to the residue. It was stirred for 4 h at 110 °C. The reaction was quenched by the addition of  $\text{Et}_2\text{O}$  (120  $\text{cm}^3$ ). The recovered organic layer was washed with water (120  $\text{cm}^3$ ), brine (100  $\text{cm}^3$ ), dried over anhydrous  $\text{MgSO}_4$  and concentrated under reduced pressure. The crude product was purified by flash column chromatography (silica gel, EtOAc : hexane = 1 : 4) and crystallized from MeOH to give  **$R_F\text{Mi}$  (**3**)** as a white solid (1.20 g, 13%);  $^1\text{H}$  NMR (400 MHz,  $\text{CDCl}_3$ ):  $\delta$  = 6.69 (s, 2 H), 3.54 (t,  $J$  = 6 Hz, 2 H), 2.15-2.00 (m, 2H), 1.73-1.55 (m, 4H).

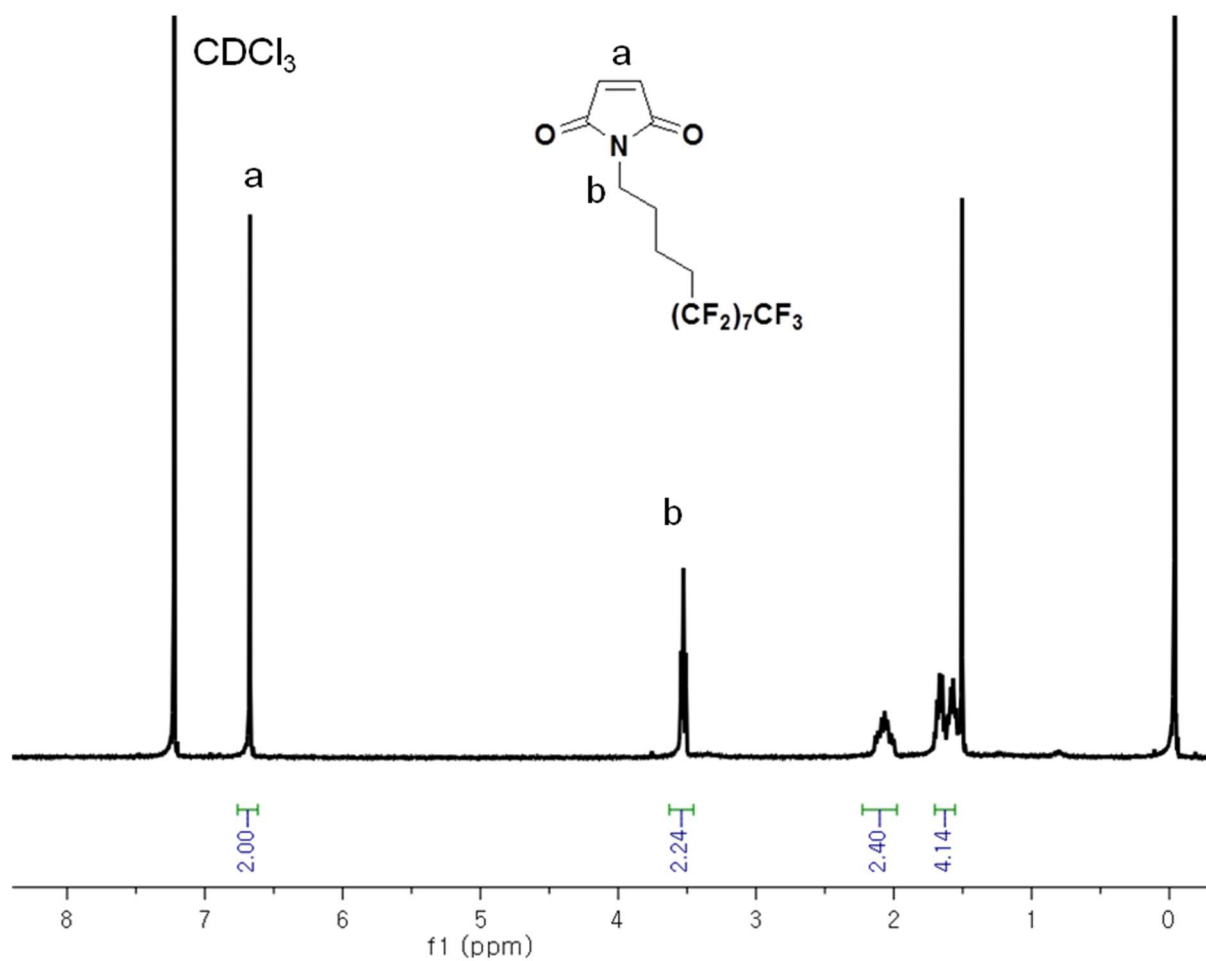

Fig. S1 :  $^1H$  NMR of  $R_fMi$  (3) synthesized by using maleic anhydride

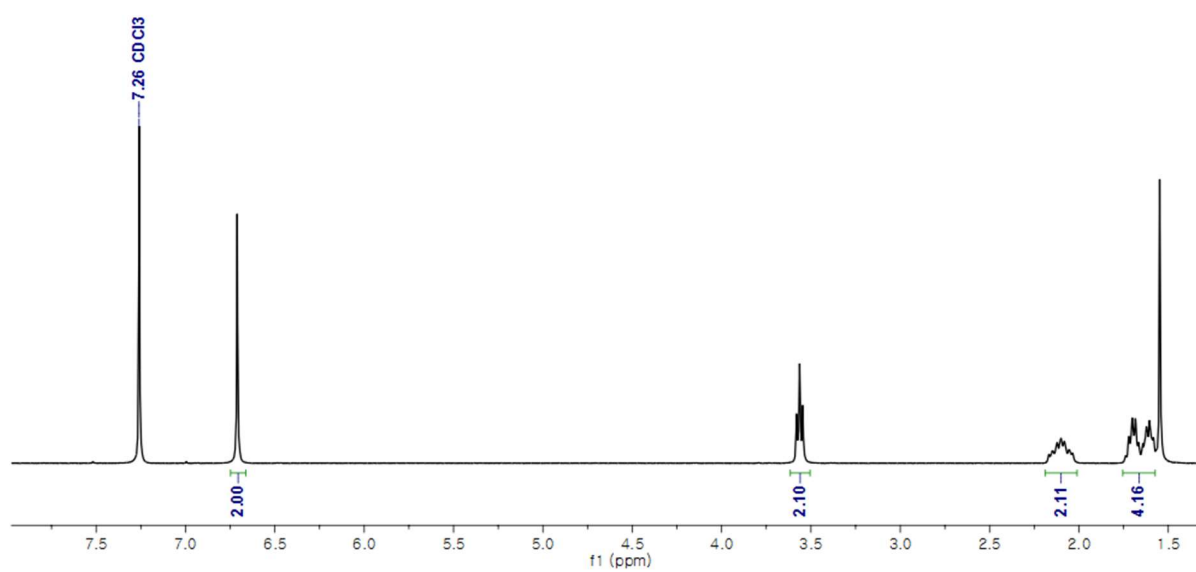

Fig. S2 :  $^1H$  NMR of  $R_fMi$  (3) synthesized by using maleimide

**1-(3,3,4,4,5,5,6,6,7,7,8,8,8-Tridecafluorooctyl)-1H-pyrrole-2,5-dione**

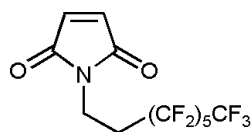

To a magnetically stirred solution of  $\text{Ph}_3\text{P}$  (2.70 g, 10.3 mmol) in THF (anhydrous,  $50 \text{ cm}^3$ ) was added diisopropyl azodicarboxylate (2.08 g, 10.3 mmol) under a  $\text{N}_2$  atmosphere at  $-78^\circ\text{C}$ . The mixture was stirred for 10 min, and another solution of 3,3,4,4,5,5,6,6,7,7,8,8,8-tridecafluorooctan-1-ol (4.50 g, 12.4 mmol) in THF ( $10 \text{ cm}^3$ ) was added to the mixture at  $-78^\circ\text{C}$ . Maleimide (1.00 g, 10.3 mmol) was then added to the solution, and the reaction mixture was allowed to warm up to ambient temperature. After stirring for 12 h, the reaction was quenched and the crude product was recovered, which did not contain the desired product, 1-(3,3,4,4,5,5,6,6,7,7,8,8,8-Tridecafluorooctyl)-1H-pyrrole-2,5-dione.

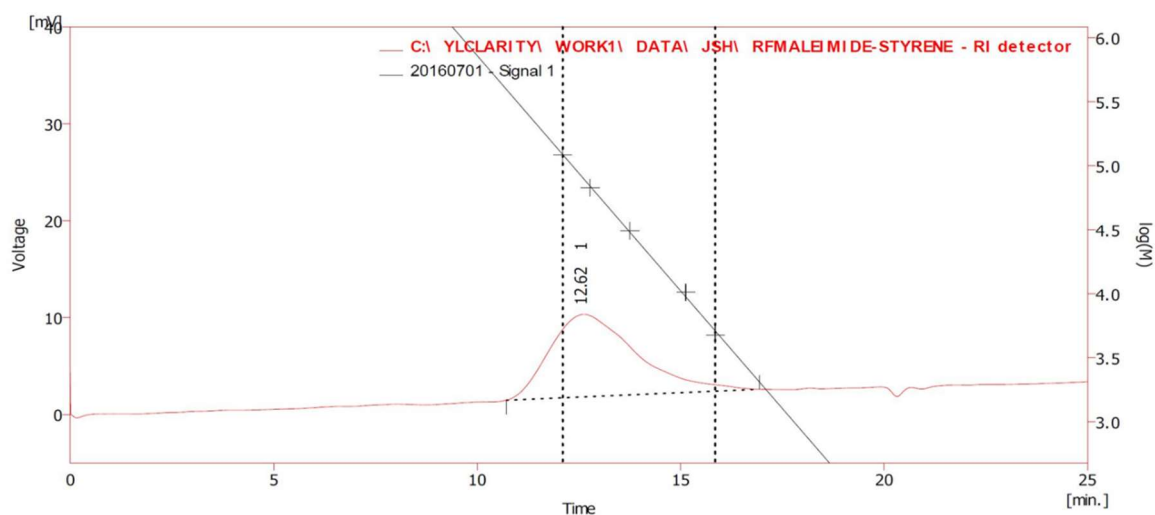

|   | Max. RT | Start RT | End RT | Mn    | Mw    | PD     | Height [mV] | Height [%] | Area [mV.s] | Area [%] |
|---|---------|----------|--------|-------|-------|--------|-------------|------------|-------------|----------|
| 1 | 12.62   | 10.71    | 16.93  | 33770 | 77073 | 2.2823 | 8.52        | 100.00     | 1258.68     | 100.00   |

**Fig S3 : GPC chromatogram and molecular weight information of P(R<sub>f</sub>Mi-St)**

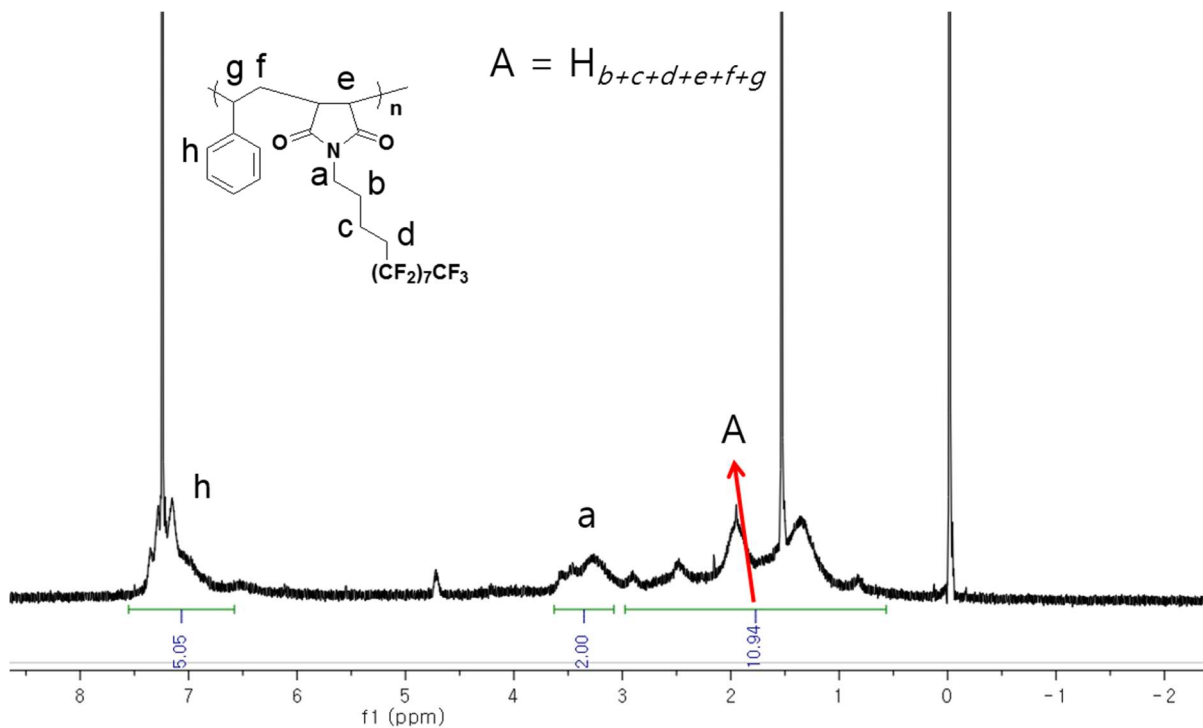

Fig. S4 : <sup>1</sup>H NMR of P(R<sub>f</sub>-Mi-St)

(a)

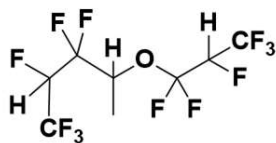

(b)

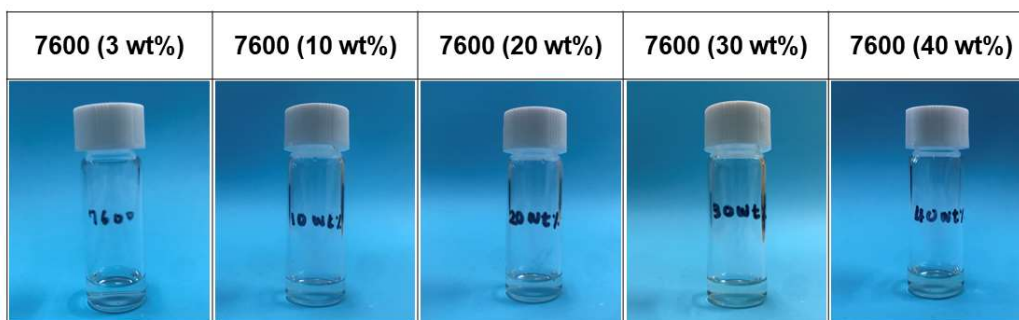

Fig S5 : (a) Chemical structure of a fluorous solvent (PF-7600) and (b) solubility test of P(R<sub>f</sub>-Mi-St) in PF-7600.

### Analysis of dissolution behaviour of P(R<sub>F</sub>Mi-St) by a quartz crystal microbalance (QCM)

To prepare samples for QCM experiment, 5 wt% solution P(R<sub>F</sub>Mi-St) in PF-7600 was spin-coated onto a QCM electrode made of quartz and Au (2.5 cm in diameter) at 1,000 rpm for 60 s to form a *ca.* 300 nm-thick film. It was baked at 110 °C for 60 s. The dissolution behaviour of P(R<sub>F</sub>Mi-St) films was then investigated in PF-7600.

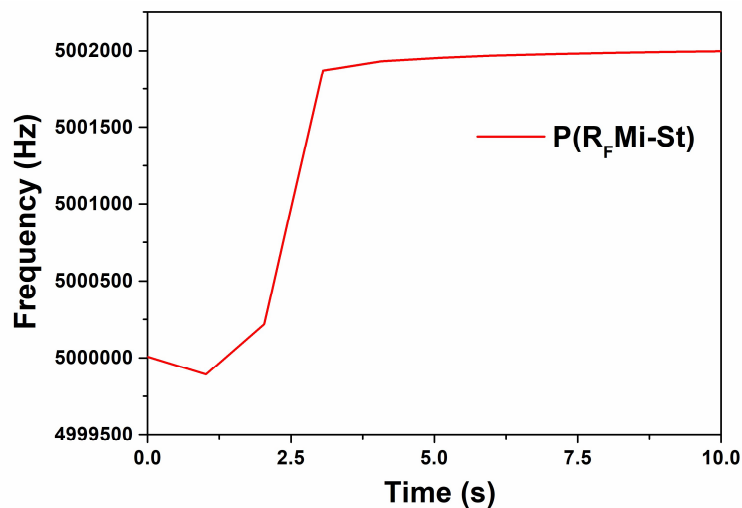

Fig S6 : Dissolution behaviour of P(R<sub>F</sub>Mi-St) in PF-7600 according to time by a QCM method.

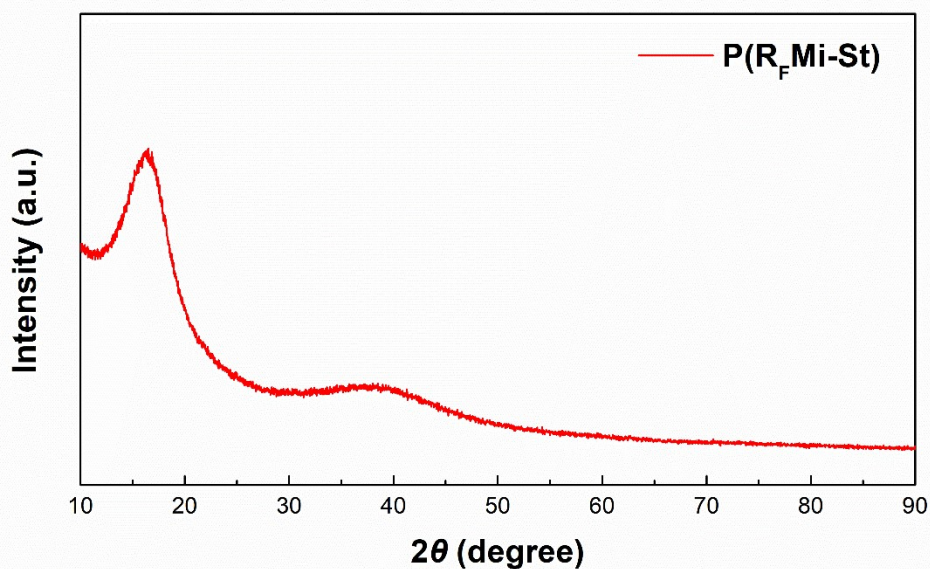

Fig S7 : Powder X-ray diffraction (XRD) spectrum of P(R<sub>F</sub>Mi-St).

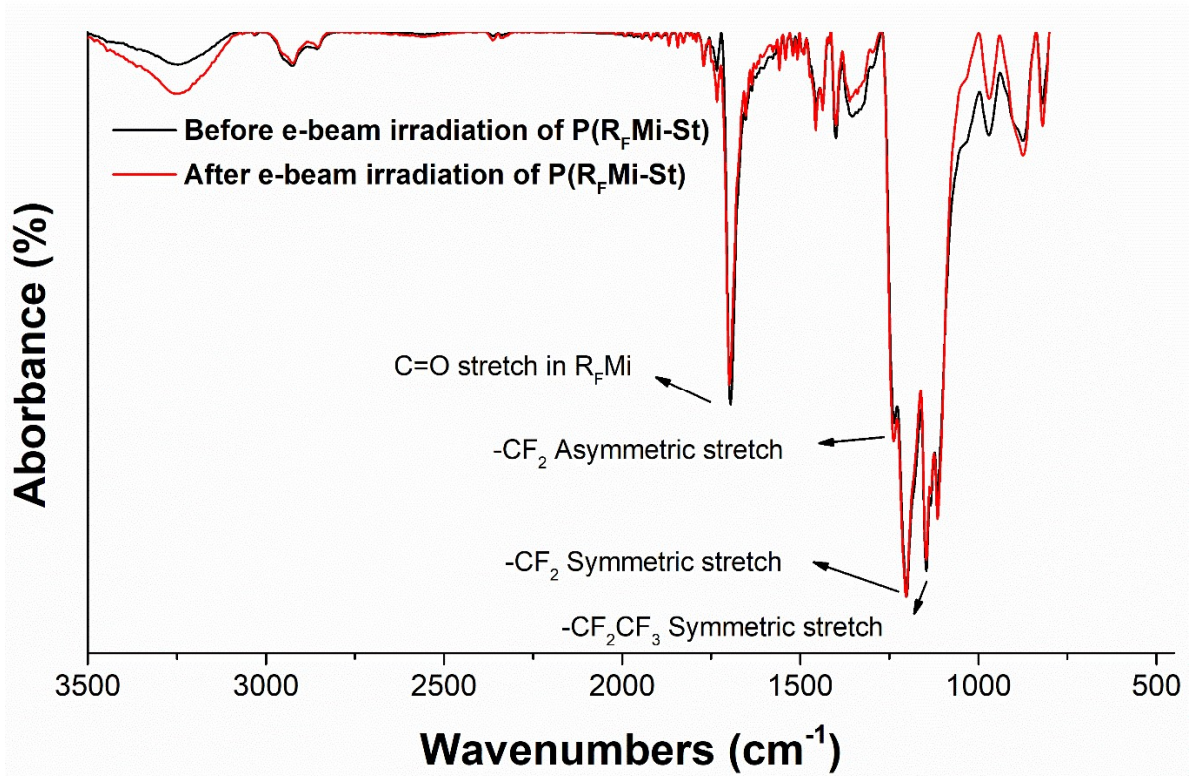

Fig S8 : FT-IR spectra of P(R<sub>f</sub>Mi-St) films on Si wafer before and after e-beam exposure.

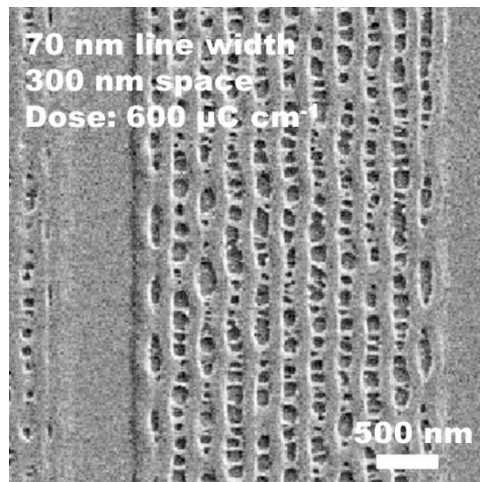

Fig S9 : SEM images of line and space patterns of a high molecular weight P(R<sub>f</sub>Mi-St) ( $M_n = 33,800$  and  $\bar{D} = 2.3$ )

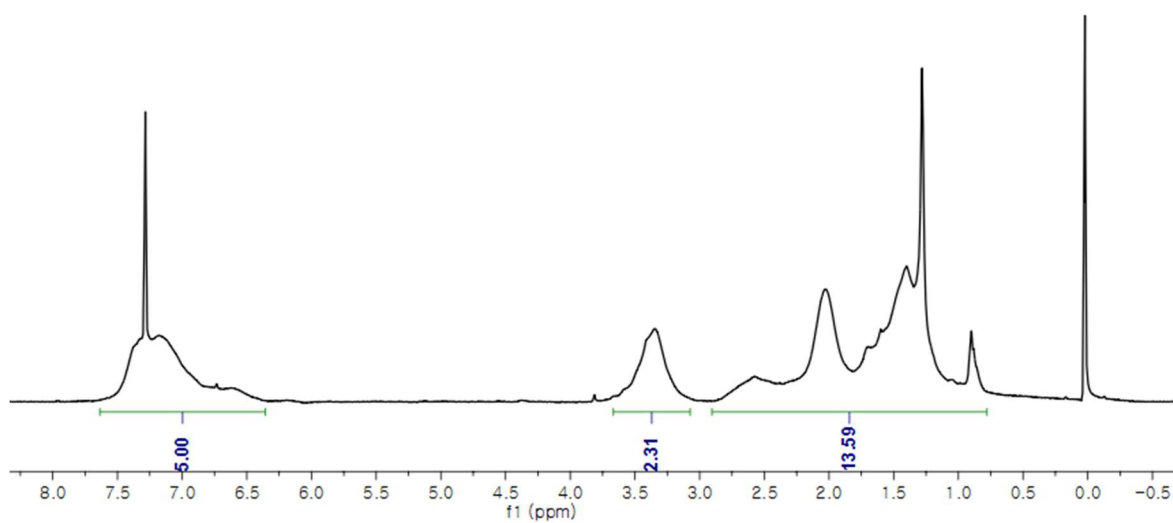

Fig. S10 :  $^1\text{H}$  NMR spectrum of P(R<sub>f</sub>Mi-St)-R

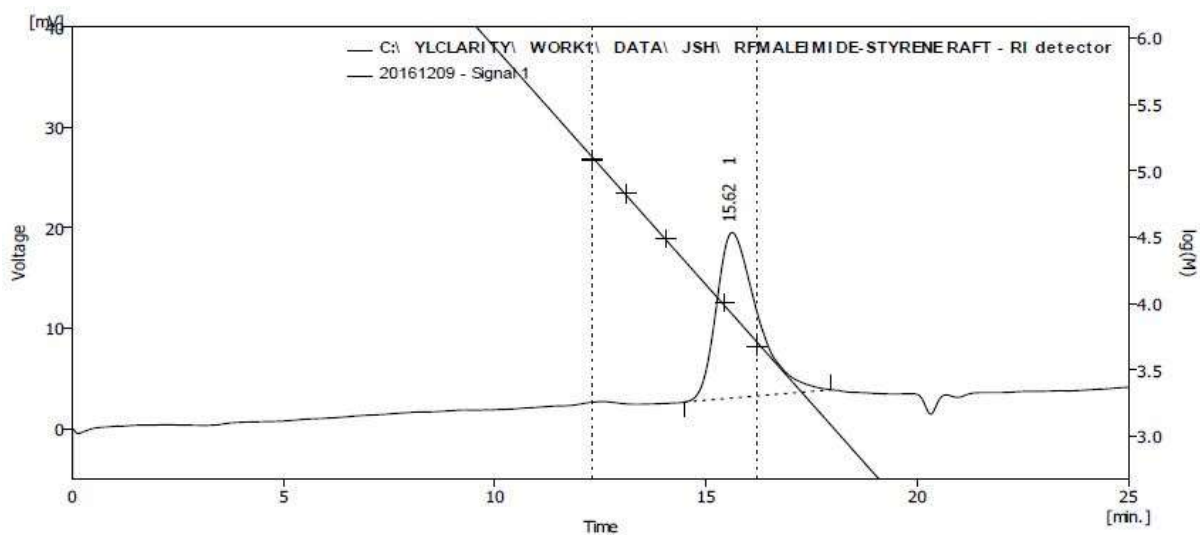

|   | Max. RT | Start RT | End RT | Mn   | Mw   | PD     | Height [mV] | Height [%] | Area [mV.s] | Area [%] |
|---|---------|----------|--------|------|------|--------|-------------|------------|-------------|----------|
| 1 | 15.62   | 14.50    | 17.97  | 6255 | 7534 | 1.2044 | 16.47       | 100.00     | 1116.64     | 100.00   |

Fig S11 : GPC chromatogram and molecular weight information of P(R<sub>f</sub>Mi-St)-R



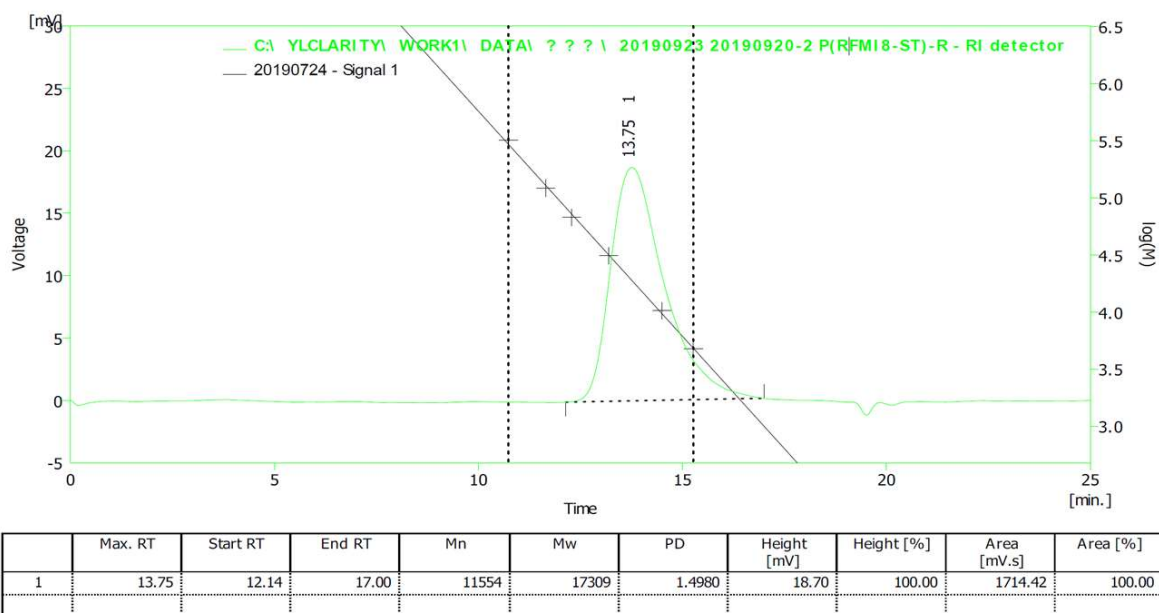

Fig S12 : GPC chromatogram and molecular weight of P(RfMi-St)-R

### Mechanical properties measurement by nanoindentation

15wt% Solution of P(RfMi-St) in PF-7600 was spin-coated on to a Si wafer and baked at 110 ° C for 1 min. The cast films (thickness *ca.* 650 nm) were exposed to e-beam with increasing doses of 100, 300, 500, 700, 900 and 1,100  $\mu\text{C cm}^{-2}$ , and washed in PF-7600. A Berkovich diamond tip approached the polymer patterns with 100 nm  $\text{s}^{-1}$  and penetrated down to 300 nm with a strain rate of 0.05  $\text{s}^{-1}$ . The vibration amplitude (2 nm) and frequency (100 Hz) were respectively used. Nine indentations were performed on each sample. The hardness and reduced modulus of the P(RfMi-St) patches were compared with data collected at 200 nm penetration depth.
